# Supplementary material for: Yeast Nup84-Nup133 complex structure details flexibility and reveals conservation of the membrane anchoring ALPS motif
Source: PubMed Central journal article supplement (PMC7695694; doi:10.1038/s41467-020-19885-5), 2020-11-27
Supplement: 41467_2020_19885_MOESM1_ESM.pdf [file 41467_2020_19885_MOESM1_ESM.pdf]

## **Supplementary Information for:**

Yeast Nup84-Nup133 complex structure details flexibility and reveals conservation of the membrane anchoring ALPS motif

Sarah A. Nordeen<sup>1</sup>, Daniel L. Turman<sup>1</sup> & Thomas U. Schwartz<sup>1\*</sup>

<sup>1</sup>Department of Biology, Massachusetts Institute of Technology, Cambridge, Massachusetts, United States

\*corresponding author

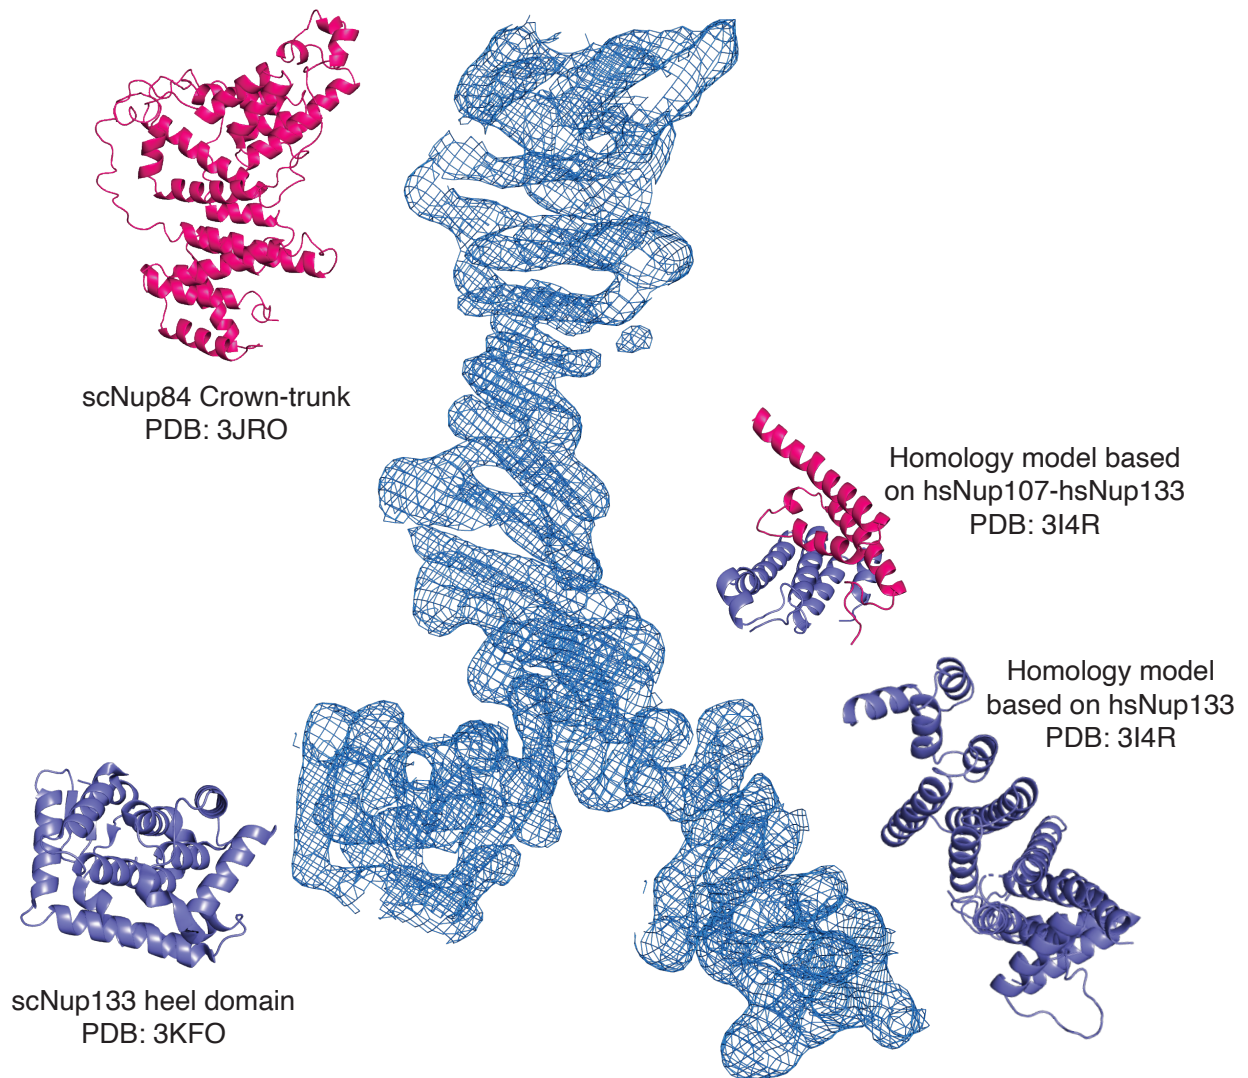

### Supplementary Figure 1.

#### Electron density map for the Nup84-Nup133<sub>CTD</sub> structure.

Final  $2F_o - F_c$  electron density map contoured at  $1.5 \sigma$  with fragments used to build the structure. Density for VHH-SAN8 was excluded for clarity.

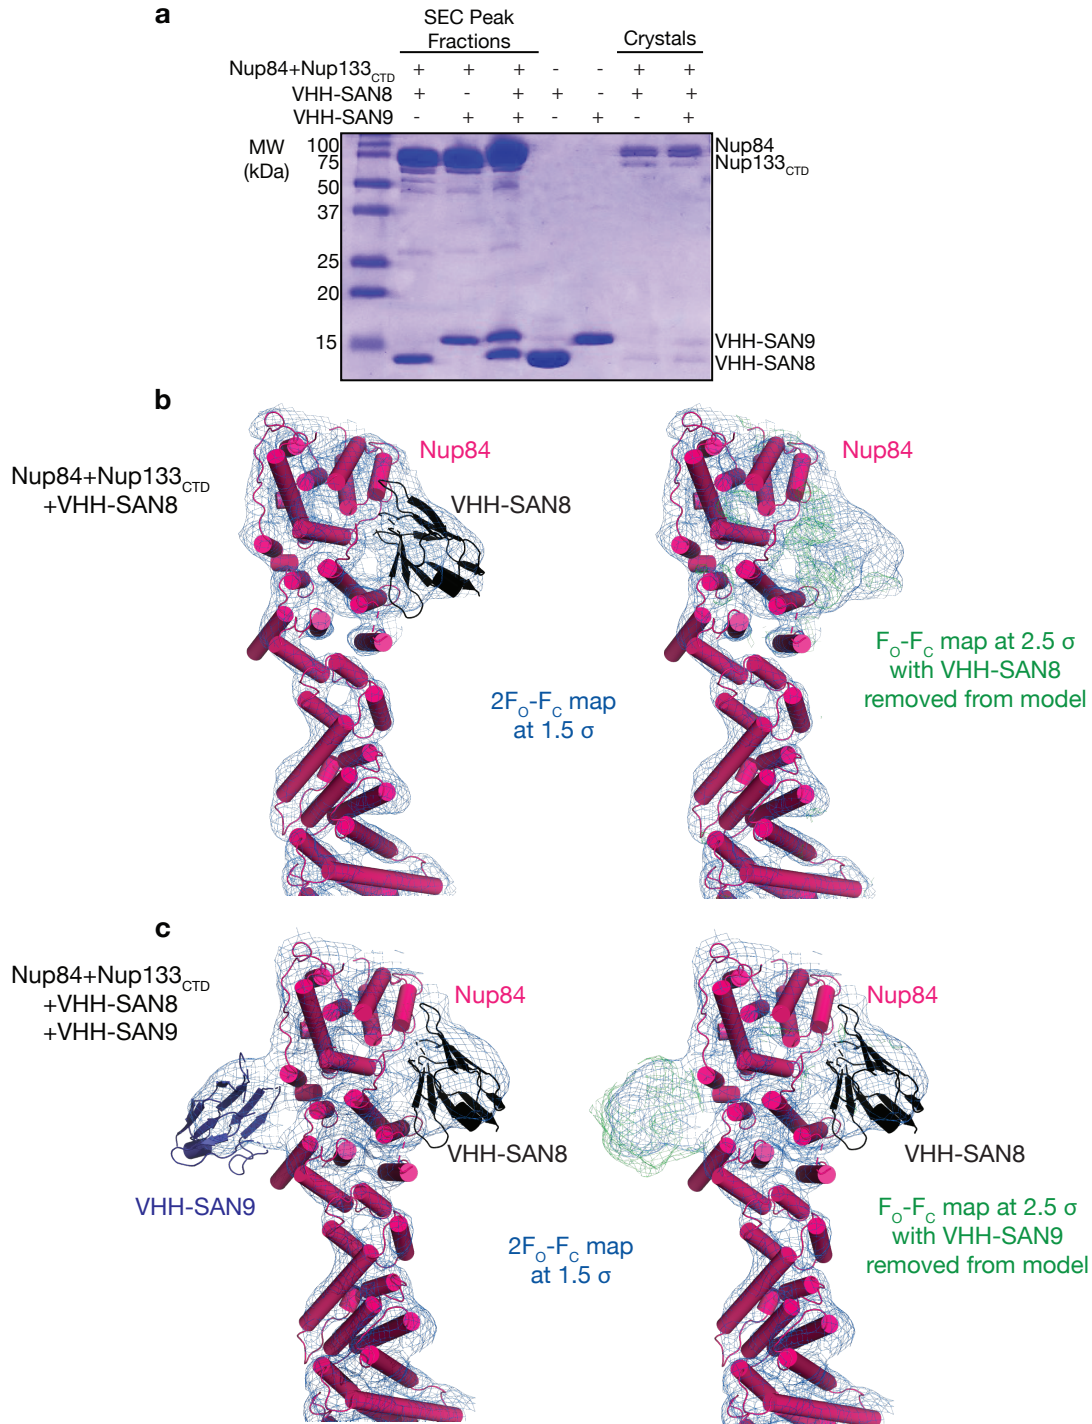

## Supplementary Figure 2.

### VHH-SAN8 and VHH-SAN9 are present in the structures.

(a) SDS-PAGE gel of purified Nup84-Nup133<sub>CTD</sub>-VHH complexes and crystals of Nup84-Nup133<sub>CTD</sub>-VHH-SAN8 and Nup84-Nup133<sub>CTD</sub>-VHH-SAN8/9 complexes. The gel is representative of two independent experiments. (b) Binding location of VHH-SAN8 shown by density in both  $2F_o-F_c$  (left) and  $F_o-F_c$  omit map when VHH-SAN8 is removed from the structure (right). (c) Same analysis as in (b) with the structure of Nup84-Nup133<sub>CTD</sub>-VHH-SAN8/9.

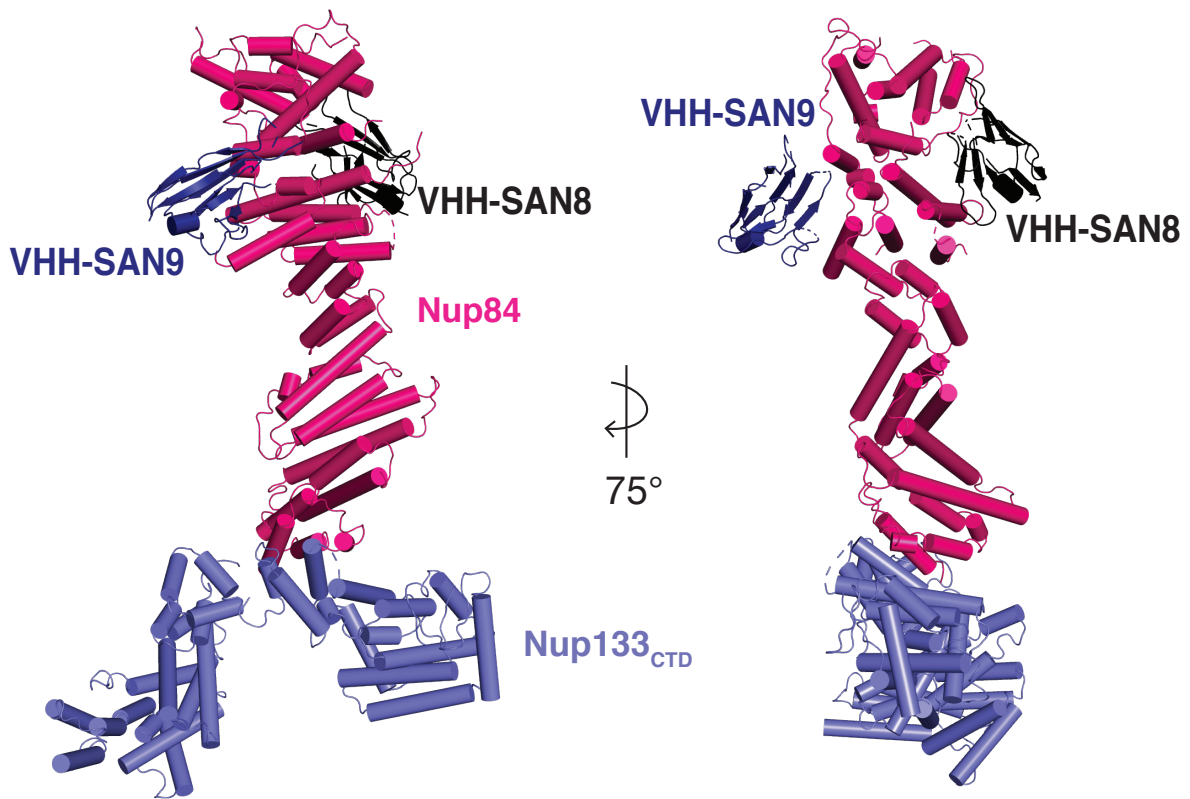

### Supplementary Figure 3.

#### Structure of the *S. cerevisiae* Nup84-Nup133<sub>CTD</sub>-VHH-SAN8/9 complex.

Structure of Nup84-Nup133<sub>CTD</sub>-VHH-SAN8, with Nup84 in pink, Nup133<sub>CTD</sub> in purple, and VHH-SAN8 in black, VHH-SAN9 shown in navy.

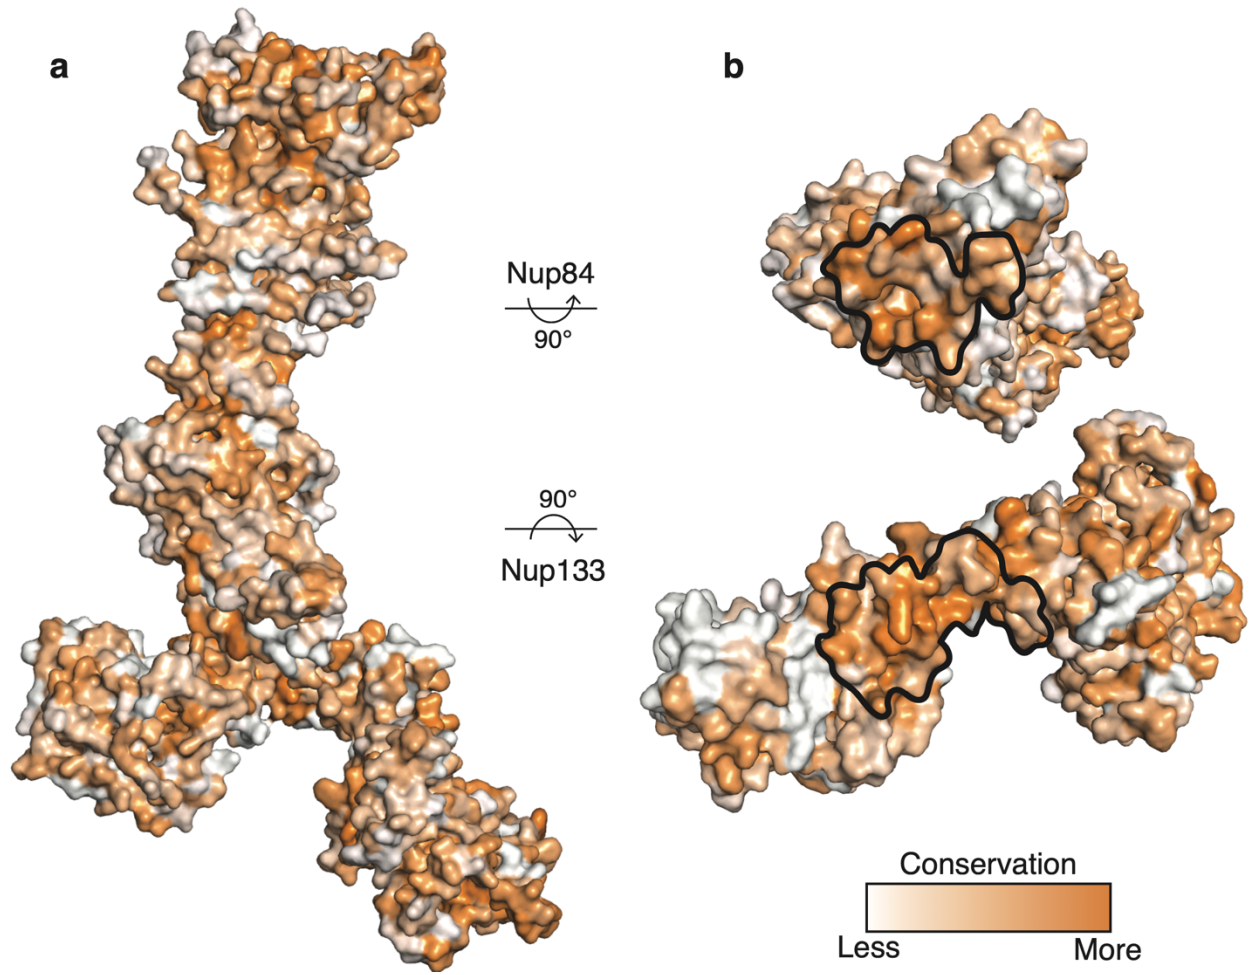

#### Supplementary Figure 4.

##### Conservation of Nup84-Nup133<sub>CTD</sub>.

(a) Surface rendering of Nup84-Nup133<sub>CTD</sub> with a color gradient depicting conservation across diverse eukaryotes. (b) Open-book depiction of the interface between Nup84 and Nup133. The binding interface is outlined in black.

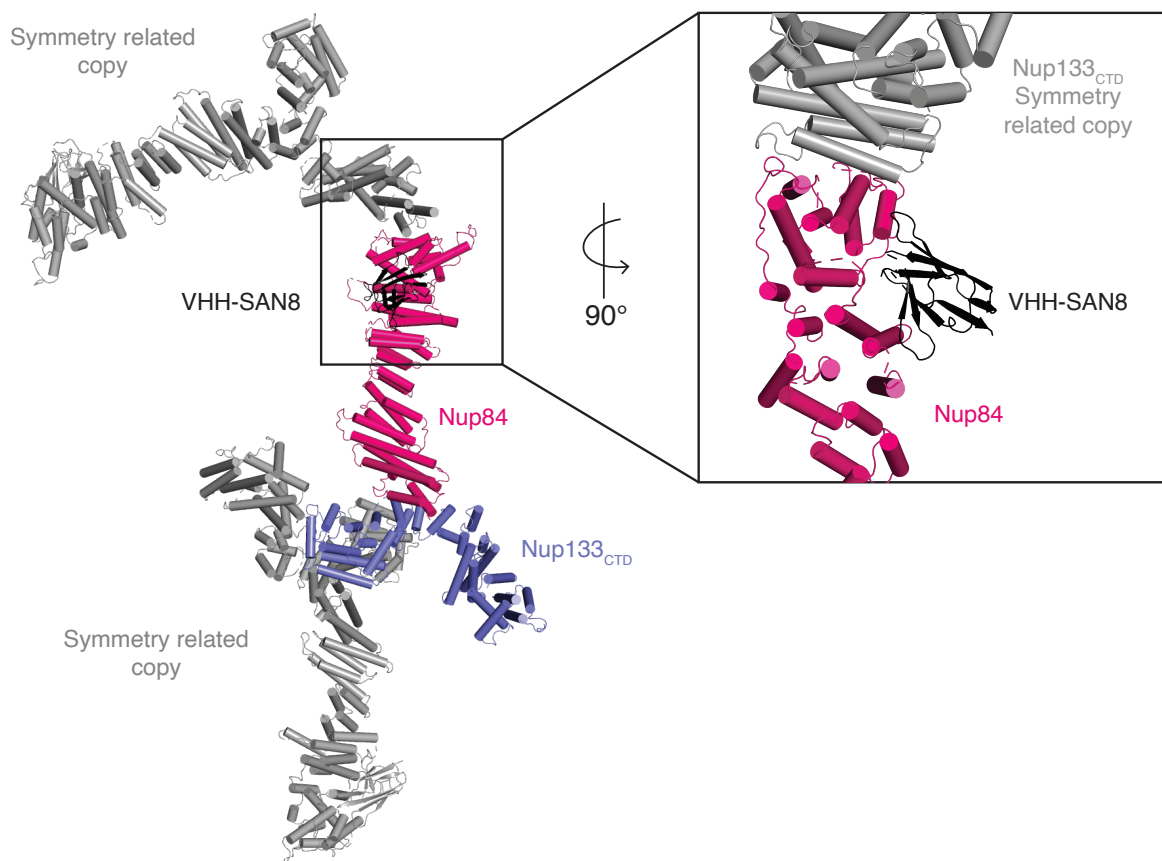

### Supplementary Figure 5.

#### VHH-SAN8 is critical for rigidifying a crystal packing interface.

Depiction of packing interactions within the crystal. Two symmetry related copies are shown for Nup84-Nup133<sub>CTD</sub>-VHH-SAN8 (gray). Inset shows a closer view of the interaction between Nup84 and a symmetry related copy of Nup133<sub>CTD</sub>.

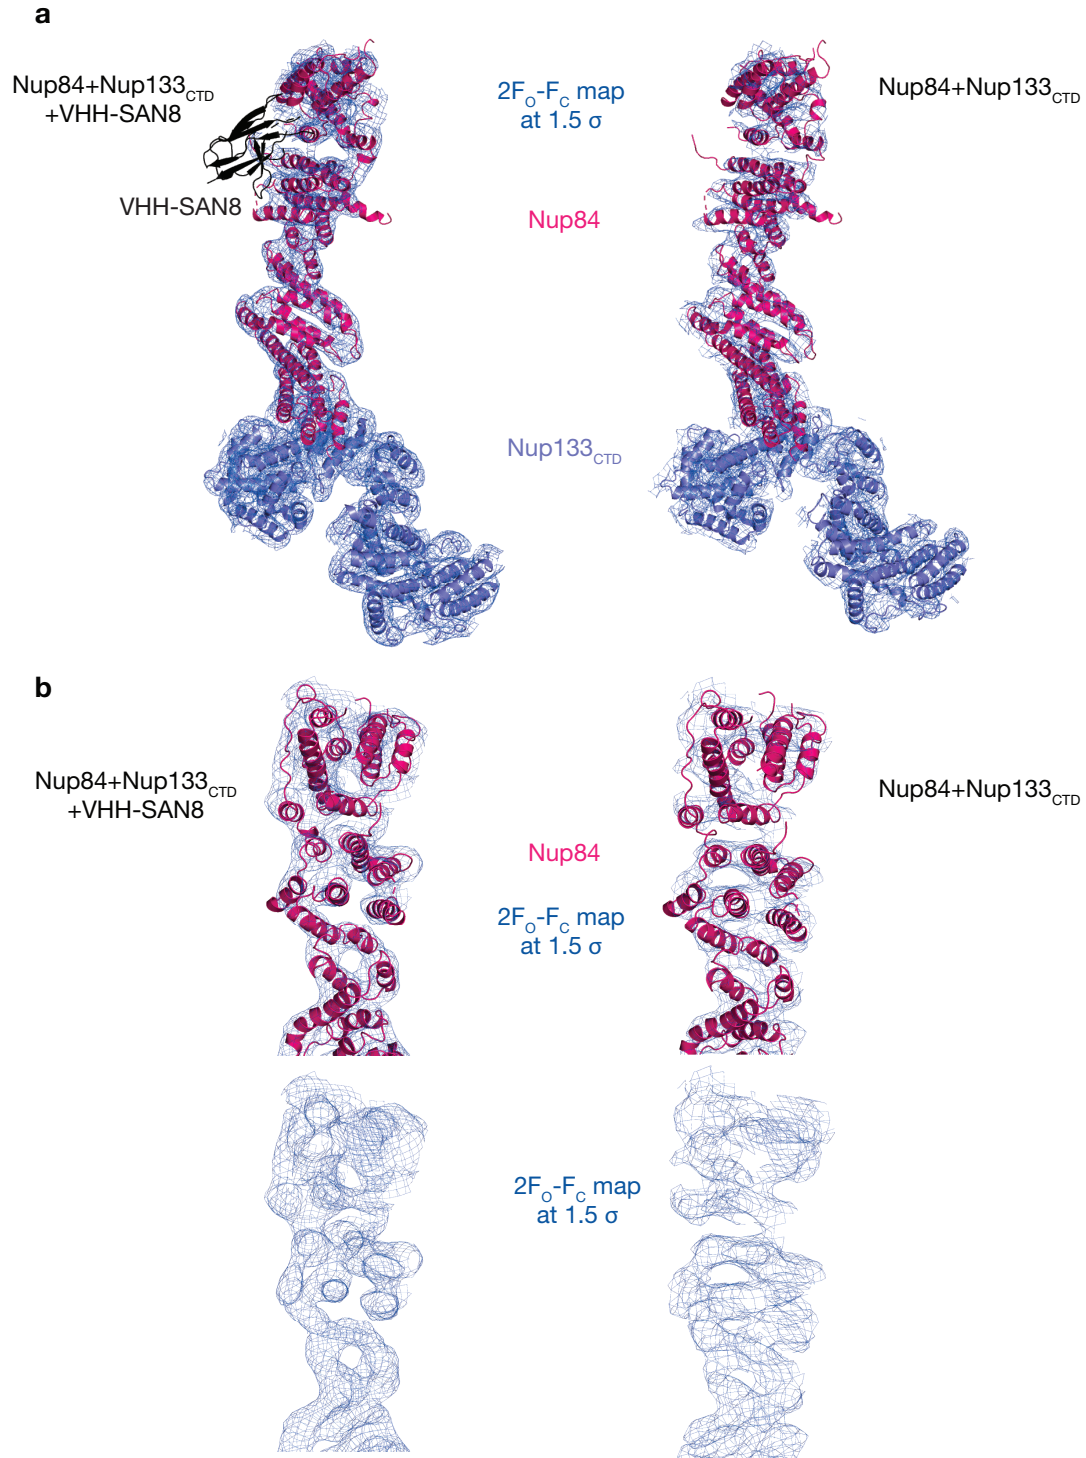

### Supplementary Figure 6.

#### VHH-SAN8 rigidifies Nup84 crown within the crystal.

(a) Comparison of the 2F<sub>o</sub>-F<sub>c</sub> maps for the crystal structures of Nup84-Nup133<sub>CTD</sub>-VHH-SAN8 (left) and apo-Nup84-Nup133<sub>CTD</sub> (right). Map density contoured at 1.5 $\sigma$ . (b) Comparison as in (a), with emphasize on the Nup84<sub>crown-trunk</sub> area, with the model of Nup84 positioned (above) and without (below). While both unit cells are nearly the same, the nanobody-bound structure is much better defined and has

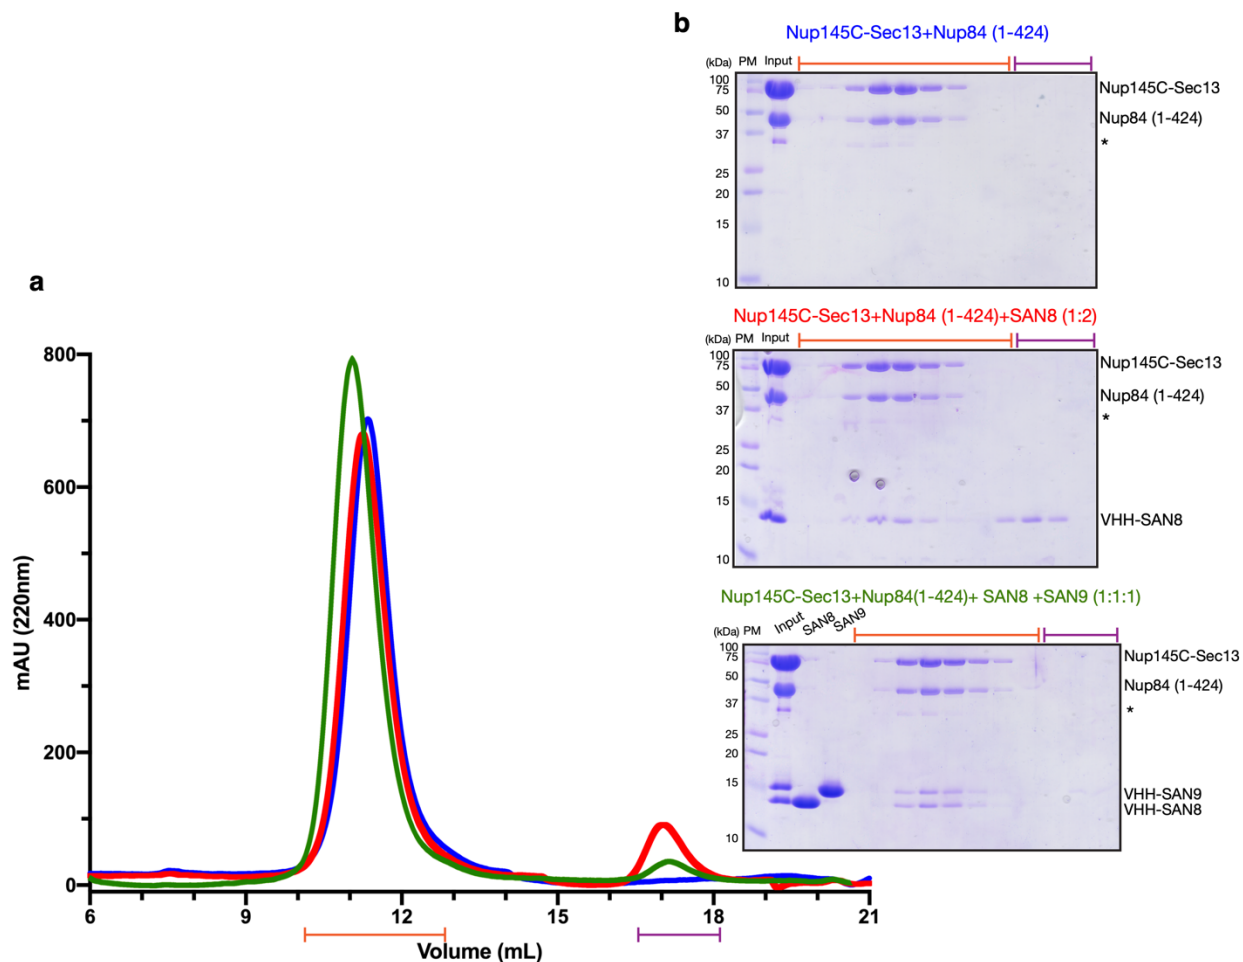

## Supplementary Figure 7.

### VHH-SAN8, VHH-SAN9 bind Nup84 with in complex with Nup145C.

(a) Size exclusion chromatography (SEC) for Nup145C-Sec13<sub>fusion</sub>+Nup84<sub>1-424</sub> (blue), pre-incubated with VHH-SAN8 (1:2 molar ratio) (red), or pre-incubated with VHH-SAN8 and VHH-SAN9 (1:1:1 molar ratio) (green). (b) SDS-PAGE analysis of the SEC fractions indicated for each SEC experiment. \*indicates contaminant protein. Co-elution of VHH-SAN8 and VHH-SAN8/9 shows that both nanobodies can bind Nup84 while in complex with Nup145C. Each panel is representative of two independent experiments.



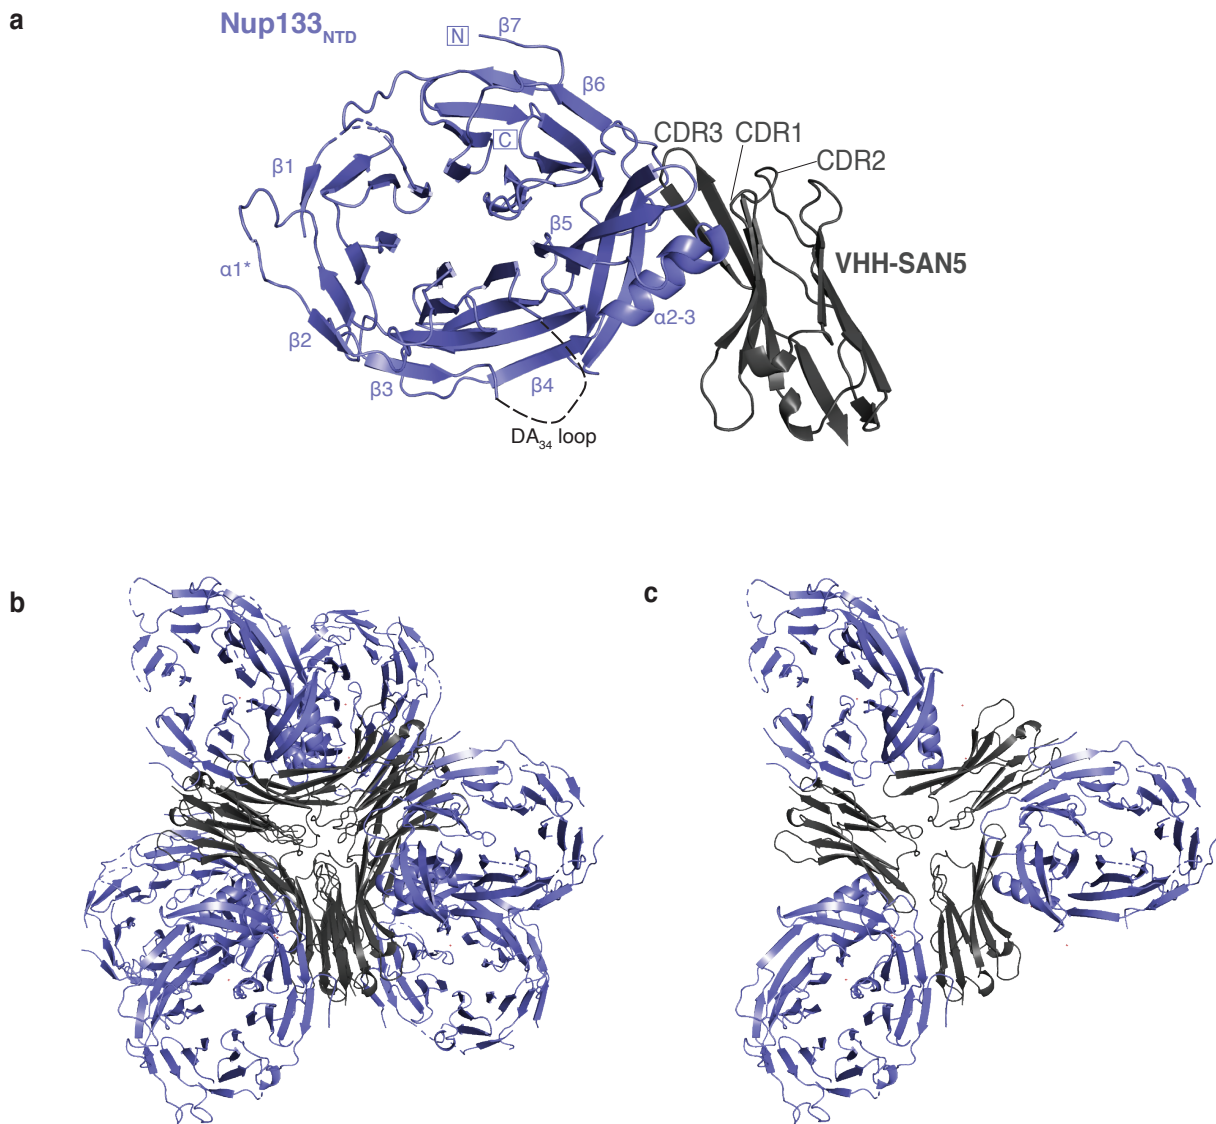

### Supplementary Figure 8.

#### Structure of Nup133<sub>NTD</sub>-VHH-SAN5 complex.

(a) Nup133<sub>NTD</sub>-VHH-SAN5, with Nup133<sub>NTD</sub> in purple and VHH-SAN5 in dark gray. N and C termini are indicated, and  $\beta$ -sheets and  $\alpha$ -helices are labeled on Nup133<sub>NTD</sub>. Complementarity determining region (CDR) loops are labeled on VHH-SAN5. (b) Packing of Nup133<sub>NTD</sub>-VHH-SAN5 in the asymmetric unit. Colors as in (a). (c) Heterohexameric assembly within the asymmetric unit highlighting packing interfaces mediated by VHH-SAN5.

## Supplementary Table 1. BackPhyre Structural Homology Results

Table includes hits that cover >100 amino acids and >30% confidence.

| Protein | Description                                               | Alignment coverage (%) | Confidence | % Sequence ID |
|---------|-----------------------------------------------------------|------------------------|------------|---------------|
| Nic96   | Scaffold nucleoporin, Nic96/inner ring complex            | 224-637 (63)           | 98.7       | 18            |
| Nup145C | Scaffold nucleoporin, Y complex                           | 1,027-1,284 (39)       | 97.2       | 16            |
| Sec31   | COPII vesicle coat component                              | 643-875 (35)           | 95.1       | 18            |
| Sea4    | SEA complex, lysosomal membrane interaction and autophagy | 772-996 (34)           | 79.0       | 25            |
| Sec16   | COPII vesicle coat assembly                               | 255-340 (13)           | 72.5       | 17            |
| Nup85   | Scaffold nucleoporin, Y complex                           | 465-566 (15)           | 31.5       | 14            |

## Supplementary Table 2. List of Primer Sequences for Cloning

| Name                             | Forward primer (5'-3')                                   | Reverse primer (5'-3')                                   | Purpose                                                                |
|----------------------------------|----------------------------------------------------------|----------------------------------------------------------|------------------------------------------------------------------------|
| Nup133 NTD insert                | GTTCTGTTCCAGGGGC<br>CCGGATTCGATAATTCC<br>AAGGTTTTTCACAG  | CCAGACTCGAGGGTAC<br>CTTACTACTCTTTCACA<br>AAAAACTGTAGCACC | Amplify Nup133 NTD for Gibson assembly                                 |
| pET28 vector open for Nup133 NTD | GGTGCTACAGTTTTTTG<br>TGAAAGAGTAGTAAGGT<br>ACCCTCGAGTCTGG | CTGTGAAAACCTTGGA<br>ATTATCGAATCCGGGC<br>CCCTGGAACAGAAC   | Amplify pET28 6His vector for Gibson assembly                          |
| Nup133 ALPS mutant               | GGAGGTGGGGGATCCC<br>GAAATGGACCTATCCTC<br>GG              | GGATCCCCCACCTCCA<br>GGTTTTATTTAATAGTTT<br>GCCTAACTTCAG   | Inverse PCR primers to make Nup133 ALPS mutant                         |
| Nanobody hit insert              | GACTGGTGGCTCAAGT<br>GGATCCATGCAGGTGC<br>AGCTCGTG         | ATGCGGCCGTGTACAT<br>TATCACTATTATGCGG<br>CACGCGGTTCC      | Amplify nanobody hit sequences for Gibson assembly                     |
| Open pAH His14bdSUMO             | GGAACCGCGTGCCGCA<br>TAATAGTGATA                          | GCATGGATCCACTTGA<br>GCCACCAGTC                           | Amplify pAH His14BdSUMO vector for nanobody expression Gibson assembly |
